# Supplementary material
Source: PubMed Central journal article supplement (PMC8105027)
Supplement: AEM.02201-20-s0001.pdf [file AEM.02201-20-s0001.pdf]

1 **SUPPLEMENTARY FIGURES**

**A**

Per Sequence Quality Scores

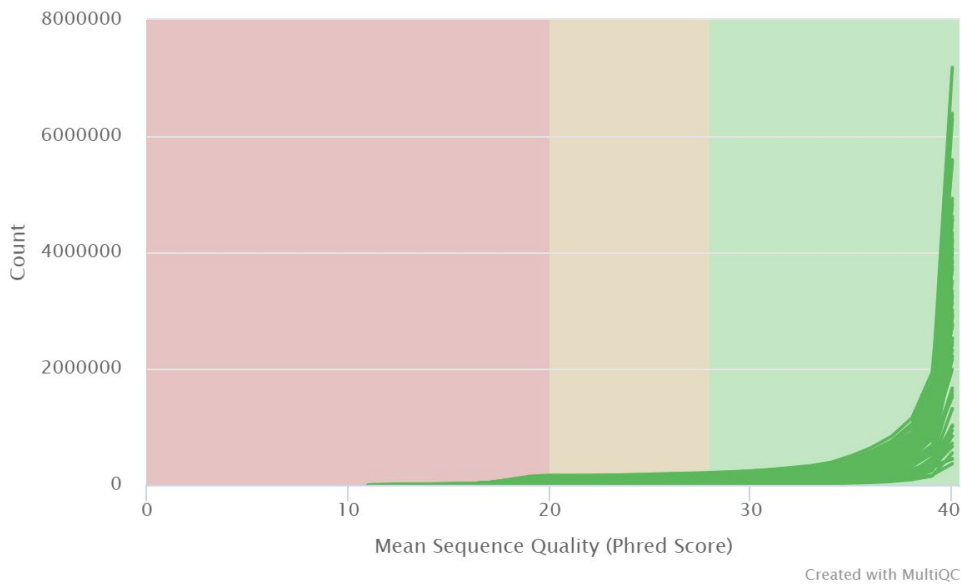

**B**

Mean Quality Scores

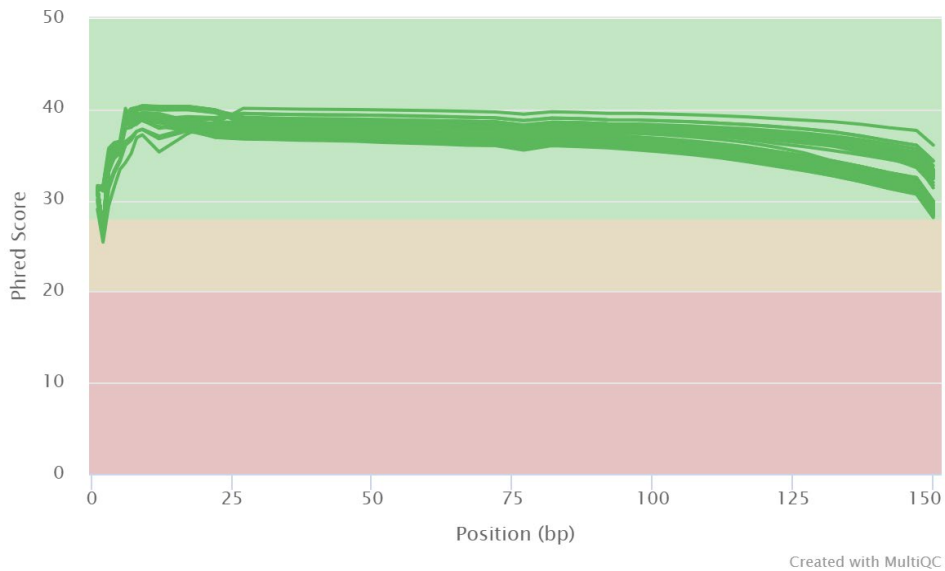

2  
3  
4  
5  
6

**Supl Figure 1. Quality score from sequencing run.** (A) The per sequence quality score indicate the mean quality score per sequence. (B) The quality scores per position in the sequences.

Suppl Table 1. Questionnaire information about diet

| Mother/<br>Child<br>pair | BM<br>3m | BM<br>6m | BM<br>9m | BM<br>12<br>m | EB<br>F<br>3m | EB<br>F<br>6m | Soli<br>ds<br>0-<br>3m | Soli<br>ds<br>3m | Soli<br>ds<br>4m | Soli<br>ds<br>5-<br>6m | Dai<br>ry<br>6m | Dai<br>ry<br>9m | Dai<br>ry<br>12<br>m |
|--------------------------|----------|----------|----------|---------------|---------------|---------------|------------------------|------------------|------------------|------------------------|-----------------|-----------------|----------------------|
| 1                        | 1        | 1        | 0        | 0             | 0             | 0             | 0                      | 0                | 1                | 0                      | 0               | 0               | 1                    |
| 11                       | 1        | 1        | 0        | 0             | 0             | 0             | 0                      | 0                | 1                | 0                      | 1               | 1               | 1                    |
| 16                       | 1        | 1        | 1        | 1             | 1             | 0             | 0                      | 0                | 0                | 1                      | 0               | 1               | 1                    |
| 21                       | 1        | 1        | 1        | 1             | 1             | 0             | 0                      | 0                | 1                | 0                      | 0               | 1               | 1                    |
| 26                       | 1        | 1        | 1        | 0             | 1             | 0             | 0                      | 0                | 1                | 0                      | 1               | 1               | 1                    |
| 31                       | 1        | 1        | 0        | NaN           | 1             | 0             | 0                      | 0                | 1                | 0                      | 1               | 1               | NaN                  |
| 36                       | 1        | 1        | 1        | NaN           | NaN           | 0             | NaN                    | 0                | 0                | 1                      | 1               | 0               | NaN                  |
| 172                      | 1        | 1        | 1        | 1             | 1             | 0             | 0                      | 1                | 0                | 0                      | 1               | 1               | 1                    |
| 177                      | 1        | 1        | 1        | 0             | 1             | 0             | 0                      | 1                | 0                | 0                      | 1               | 1               | 1                    |
| 197                      | 1        | 0        | 0        | 0             | 0             | 0             | 0                      | 0                | 0                | 0                      | 0               | 1               | 1                    |
| 207                      | 1        | 1        | 1        | 1             | 1             | 0             | 0                      | 0                | 0                | 1                      | 1               | 1               | 1                    |
| 217                      | 1        | 1        | 1        | 1             | 1             | 0             | 0                      | 0                | 0                | 1                      | 0               | 0               | 1                    |
| 232                      | 1        | 1        | 1        | 1             | 1             | 0             | 0                      | 0                | 1                | 0                      | 1               | 1               | 1                    |
| 237                      | 1        | 1        | 1        | 0             | 0             | 0             | 0                      | 0                | 1                | 0                      | 0               | 1               | 1                    |
| 41                       | 1        | 0        | 0        | 0             | 0             | 0             | 1                      | 0                | 0                | 0                      | 0               | 1               | 1                    |
| 46                       | 1        | 1        | 1        | 0             | 1             | 0             | 0                      | 0                | 0                | 1                      | 1               | 0               | 0                    |
| 212                      | 1        | 1        | 1        | NaN           | 1             | 0             | 0                      | 0                | 1                | 0                      | 0               | 1               | NaN                  |
| 222                      | 1        | 1        | 1        | 0             | 1             | 0             | 0                      | 1                | 0                | 0                      | 1               | 1               | 1                    |
| 227                      | 1        | 0        | 0        | 0             | 0             | 0             | 0                      | 0                | 0                | 0                      | 0               | 1               | 1                    |
| 242                      | 1        | 1        | 1        | 1             | 1             | 0             | 0                      | 0                | 1                | 0                      | 1               | 0               | 0                    |
| 252                      | 1        | 1        | 1        | 1             | 1             | 1             | 0                      | 0                | 0                | 0                      | 0               | 0               | 1                    |
| 257                      | 1        | NaN      | NaN      | NaN           | 1             | NaN           | 0                      | NaN              | NaN              | NaN                    | NaN             | 0               | NaN                  |
| 267                      | 1        | 1        | 1        | 1             | 1             | 0             | 0                      | 0                | 1                | 0                      | 1               | 1               | 1                    |
| 292                      | 1        | 1        | 1        | 0             | 0             | 0             | 0                      | 0                | 1                | 0                      | 0               | 1               | 1                    |
| 6                        | 1        | NaN      | NaN      | 1             | 0             | NaN           | 0                      | NaN              | NaN              | NaN                    | NaN             | NaN             | 0                    |
| 182                      | 1        | 1        | 1        | NaN           | 1             | 1             | 0                      | 0                | 0                | 0                      | 0               | 1               | NaN                  |
| 187                      | 1        | 1        | 1        | 0             | 0             | 0             | 0                      | 0                | 1                | 0                      | 1               | 1               | 0                    |
| 272                      | 1        | 1        | 1        | 1             | 1             | NaN           | 0                      | NaN              | NaN              | NaN                    | NaN             | 0               | 0                    |
| 282                      | 1        | 1        | 1        | 0             | 1             | 0             | 0                      | 0                | 0                | 1                      | 0               | 0               | 1                    |
| 287                      | 1        | 1        | 1        | 1             | NaN           | 0             | NaN                    | 0                | 1                | 0                      | 0               | 1               | 1                    |
| 302                      | 1        | 1        | 1        | 0             | 0             | 0             | 0                      | 0                | 1                | 0                      | 0               | 1               | 1                    |
| 307                      | 1        | 1        | 0        | 0             | 0             | 0             | 0                      | 0                | 1                | 0                      | 1               | 1               | 1                    |
| 247                      | 1        | 1        | 1        | 1             | 1             | 0             | 0                      | 0                | 1                | 0                      | 0               | 1               | 0                    |
| 277                      | 1        | 1        | 1        | 1             | NaN           | 0             | NaN                    | 0                | 1                | 0                      | 1               | 1               | 1                    |
| 321                      | 1        | 1        | 1        | 0             | 1             | 0             | 0                      | 0                | 1                | 0                      | 0               | 1               | 1                    |
| 329                      | 1        | 0        | 0        | 0             | 1             | 0             | 0                      | 0                | 0                | 0                      | 0               | 0               | 1                    |
| 338                      | 1        | 1        | 1        | 0             | 1             | 0             | 0                      | 0                | 0                | 1                      | 0               | 1               | 1                    |

|     |   |     |     |     |     |     |     |     |     |     |     |     |     |
|-----|---|-----|-----|-----|-----|-----|-----|-----|-----|-----|-----|-----|-----|
| 202 | 1 | 1   | 1   | 1   | 1   | 0   | 0   | 0   | 1   | 0   | 0   | 0   | 1   |
| 262 | 1 | 1   | 1   | 0   | 0   | 0   | 0   | 0   | 0   | 1   | 0   | 1   | 1   |
| 297 | 1 | 1   | 1   | 1   | 0   | 0   | 0   | 0   | 1   | 0   | 1   | 1   | 1   |
| 312 | 1 | 1   | 1   | 1   | 1   | 0   | 0   | 0   | 0   | 1   | 0   | 0   | 1   |
| 317 | 1 | 1   | 0   | 0   | 1   | 0   | 0   | 0   | 1   | 0   | 0   | 1   | 1   |
| 333 | 1 | 1   | 1   | 1   | 1   | 0   | 0   | 1   | 0   | 0   | 0   | 1   | 1   |
| 51  | 1 | 1   | 0   | 0   | 1   | 0   | 0   | 0   | 1   | 0   | 1   | 1   | 1   |
| 325 | 1 | 1   | 1   | NaN | 0   | 0   | 0   | 1   | 0   | 0   | 1   | 1   | NaN |
| 346 | 1 | 1   | 1   | 0   | 1   | 0   | 0   | 0   | 1   | 0   | 1   | 1   | 1   |
| 358 | 0 | 0   | 0   | 0   | 0   | 0   | 1   | 0   | 0   | 0   | 0   | 0   | 0   |
| 342 | 1 | 1   | 1   | 0   | NaN | 1   | 1   |
| 354 | 1 | 1   | 1   | 0   | 1   | 0   | 0   | 0   | 1   | 0   | 1   | 1   | 1   |
| 362 | 1 | 1   | 0   | 0   | 0   | 0   | 0   | 0   | 1   | 0   | 1   | 1   | 0   |
| 367 | 1 | 1   | 1   | 1   | 1   | 0   | 0   | 0   | 1   | 0   | 0   | 1   | 1   |
| 56  | 1 | 1   | 1   | 1   | 1   | 0   | 0   | 0   | 1   | 0   | 0   | 1   | 1   |
| 61  | 1 | 1   | 1   | 0   | 1   | 0   | 0   | 0   | 0   | 1   | 0   | 0   | 0   |
| 66  | 1 | 1   | 1   | 1   | 1   | 0   | 0   | 0   | 1   | 0   | 1   | 1   | 1   |
| 192 | 1 | 1   | 1   | 1   | NaN | 0   | NaN | NaN | NaN | NaN | NaN | 1   | 1   |
| 350 | 1 | 1   | 1   | 1   | 1   | 0   | 1   | 0   | 0   | 1   | 1   | 1   | 1   |
| 371 | 1 | 1   | 1   | 1   | 1   | 0   | 0   | 0   | 1   | 0   | 1   | 1   | 1   |
| 380 | 1 | 1   | 1   | 1   | 1   | 0   | 0   | 0   | 1   | 0   | 0   | 1   | 1   |
| 71  | 1 | 1   | 1   | 0   | 1   | 0   | 0   | 0   | 0   | 1   | 1   | 1   | 0   |
| 376 | 1 | 1   | 1   | 0   | 1   | 0   | 0   | 1   | 0   | 0   | 1   | 1   | 1   |
| 385 | 1 | 1   | 0   | 0   | 0   | 0   | 0   | 0   | 1   | 0   | 0   | 1   | 1   |
| 395 | 1 | NaN | NaN | NaN | 1   | NaN | 0   | NaN | NaN | NaN | NaN | NaN | NaN |
| 405 | 1 | 1   | 1   | 1   | 1   | 0   | 0   | 0   | 0   | 1   | 0   | 0   | 1   |
| 410 | 1 | 1   | 0   | 0   | 1   | 0   | 0   | 0   | 1   | 0   | 0   | 0   | 1   |
| 390 | 1 | NaN | 0   | 0   | 1   | NaN | 0   | NaN | NaN | NaN | NaN | 1   | NaN |
| 415 | 1 | 1   | 1   | 1   | 1   | 0   | 0   | 0   | 1   | 0   | 1   | 1   | 1   |
| 420 | 1 | 1   | 0   | 0   | 0   | 0   | 0   | 0   | 0   | 1   | 0   | 1   | 1   |
| 425 | 1 | 1   | 1   | 1   | 1   | 0   | 0   | 0   | 0   | 1   | 0   | 1   | 0   |
| 435 | 1 | 1   | 1   | 1   | 1   | 0   | 0   | 0   | 1   | 0   | 1   | 1   | 1   |
| 445 | 1 | 1   | 1   | 0   | 1   | 0   | 0   | 0   | 0   | 1   | 0   | 1   | 1   |
| 430 | 1 | 1   | 0   | 0   | 1   | 0   | 0   | 0   | 1   | 0   | 0   | 0   | 0   |
| 440 | 1 | 1   | 1   | 1   | 1   | 0   | 0   | 0   | 1   | 0   | 1   | 1   | 1   |
| 450 | 1 | 0   | 0   | 0   | 0   | 0   | 0   | 0   | 0   | 0   | 0   | 1   | 1   |
| 76  | 1 | 1   | 1   | 1   | 1   | 0   | 0   | 0   | 0   | 1   | 1   | 0   | 1   |
| 81  | 1 | 1   | 1   | 0   | 1   | 0   | 0   | 0   | 0   | 1   | 1   | 1   | 1   |
| 400 | 1 | NaN | NaN | NaN | 1   | NaN | 0   | NaN | NaN | NaN | NaN | NaN | NaN |
| 455 | 1 | NaN | 0   | 0   | 0   | NaN | 0   | NaN | NaN | NaN | NaN | 1   | 1   |
| 460 | 1 | 1   | 1   | 0   | 1   | 0   | 0   | 0   | 1   | 0   | 0   | 1   | 1   |
| 465 | 1 | 1   | 1   | 1   | 1   | 0   | 0   | 0   | 0   | 1   | 0   | 1   | 1   |
| 470 | 1 | 1   | 1   | 0   | 1   | 0   | 0   | 0   | 0   | 1   | 1   | 1   | 1   |

|     |   |   |   |   |     |   |     |   |   |   |   |     |     |
|-----|---|---|---|---|-----|---|-----|---|---|---|---|-----|-----|
| 475 | 1 | 1 | 1 | 1 | 1   | 0 | 0   | 0 | 0 | 1 | 0 | 1   | 1   |
| 480 | 1 | 1 | 1 | 1 | 0   | 0 | 0   | 0 | 1 | 0 | 1 | 1   | 1   |
| 92  | 1 | 1 | 1 | 1 | 1   | 0 | 0   | 0 | 1 | 0 | 1 | 1   | 1   |
| 87  | 1 | 1 | 1 | 1 | 0   | 0 | 0   | 0 | 1 | 0 | 0 | 0   | 1   |
| 97  | 1 | 1 | 1 | 0 | NaN | 0 | NaN | 0 | 1 | 0 | 0 | 1   | 1   |
| 102 | 1 | 0 | 0 | 0 | 0   | 0 | 0   | 0 | 0 | 0 | 0 | 1   | 1   |
| 107 | 1 | 1 | 1 | 1 | 1   | 0 | 1   | 0 | 1 | 0 | 1 | 1   | 1   |
| 112 | 1 | 1 | 1 | 1 | 0   | 0 | 0   | 0 | 0 | 1 | 0 | 1   | 1   |
| 117 | 1 | 1 | 0 | 0 | 1   | 0 | 0   | 1 | 0 | 0 | 1 | 1   | 1   |
| 122 | 1 | 1 | 1 | 1 | 0   | 0 | 0   | 0 | 1 | 0 | 1 | NaN | 1   |
| 127 | 1 | 1 | 1 | 1 | 0   | 0 | 0   | 1 | 0 | 0 | 0 | 0   | 0   |
| 132 | 1 | 1 | 1 | 1 | 1   | 0 | 0   | 1 | 0 | 0 | 1 | 1   | 0   |
| 137 | 1 | 1 | 1 | 1 | 0   | 0 | 0   | 0 | 0 | 1 | 1 | 1   | 0   |
| 142 | 1 | 1 | 1 | 1 | 1   | 0 | 0   | 0 | 1 | 0 | 0 | 1   | 1   |
| 147 | 1 | 1 | 1 | 1 | 1   | 0 | 0   | 0 | 0 | 1 | 0 | 1   | 1   |
| 152 | 1 | 1 | 1 | 0 | 0   | 0 | 0   | 0 | 1 | 0 | 1 | 1   | 1   |
| 157 | 1 | 1 | 0 | 0 | 0   | 0 | 0   | 0 | 1 | 0 | 0 | 1   | NaN |
| 167 | 1 | 1 | 0 | 0 | 0   | 0 | 0   | 0 | 0 | 1 | 0 | 1   | 1   |
| 162 | 1 | 0 | 0 | 0 | 0   | 0 | 0   | 0 | 0 | 0 | 0 | NaN | 1   |
| 86  | 1 | 1 | 1 | 1 | 1   | 0 | 0   | 0 | 1 | 0 | 1 | NaN | 1   |

11  
12

**Suppl Table 2. Abbreviation list**

| <b>Abbreviation</b> | <b>Full name</b>                                                 |
|---------------------|------------------------------------------------------------------|
| tre                 | Trehalose                                                        |
| sucr                | Sucrose                                                          |
| pullulan1200        | Pullulan (n = 1200 repeat units, alpha-1,4 and alpha-1,6 bounds) |
| malt                | D-Maltose                                                        |
| lcts                | Alpha-Lactose                                                    |
| xyl_D               | D-Xylose                                                         |
| pac                 | Phenylacetic acid                                                |
| mal_L               | L-Malic acid                                                     |
| gln                 | Gluconic acid                                                    |
| glc_D               | D-Glucose                                                        |
| cit                 | Citric acid                                                      |
| glu_L               | L-Glutamic acid                                                  |
| tyr_L               | L-Tyrosine                                                       |
| phe_L               | L-Phenylalanine                                                  |
| leu_L               | L-Leucine                                                        |
| his_L               | L-Histidine                                                      |
| asp_L               | L-Aspartic acid                                                  |
| arg_L               | L-Arginin                                                        |
| orn                 | Ornithine                                                        |
| asn_L               | L-Asparagine                                                     |
| succ                | Succinic acid                                                    |
| pro_L               | L-Proline                                                        |
| gln_L               | L-Glutamine                                                      |
| mnt                 | D-Mannitol                                                       |
| man                 | D-Mannose                                                        |
| gal                 | D-Galactose                                                      |
| fru                 | D-Fructose                                                       |
| strch1              | Starch, Structure 1(1,6{7[1,4-Glc], 4[1,4-Glc]})                 |
| rmn                 | L-Rhamnose                                                       |
| rib_D               | D-Ribose                                                         |
| glygn2              | Glycogen, Structure 2 (Glycogenin-1,6{7[1,4-Glc], 4[1,4-Glc]})   |
| glyc                | Glycerol                                                         |
| raffin              | Raffinose                                                        |
| salcn               | Salicin                                                          |
| cellb               | Cellobiose                                                       |
| ser_L               | L-Serin                                                          |
| pyr                 | Pyruvic acid                                                     |
| melib               | TG(18:4(6Z,9Z,12Z,15Z)/18:1(9Z)/20:5(5Z,8Z,11Z,14Z,17Z))         |
| fuc_L               | L-Fucose                                                         |
| arab_L              | L-Arabinose                                                      |

|              |                                                                                              |
|--------------|----------------------------------------------------------------------------------------------|
| arab_D       | D-Arabinose                                                                                  |
| ala_L        | L-Alanine                                                                                    |
| Tn_antigen   | Tn Antigen                                                                                   |
| T_antigen    | T-Antigen (Core 1)                                                                           |
| sTn_antigen  | Sialyl-Tn Antigen                                                                            |
| sT_antigen   | Sialil-T Antigen                                                                             |
| gncore2      | GlcNac-Alpha-1,4-Core 2                                                                      |
| gncore1      | GlcNac-Alpha-1,4-Core 1                                                                      |
| dsT_antigen  | Disialyl-T Antigen                                                                           |
| core8        | Core 8                                                                                       |
| core7        | Core 7                                                                                       |
| core6        | Core 6                                                                                       |
| core5        | Core 5                                                                                       |
| core4        | Core 4                                                                                       |
| core3        | Core 3                                                                                       |
| core2        | Core 2                                                                                       |
| acgam        | N-Acetyl-D-glucosamine                                                                       |
| trp_L        | L-Tryptophan                                                                                 |
| val_L        | L-Valine                                                                                     |
| thr_L        | L-Threonine                                                                                  |
| inulin       | Inulin                                                                                       |
| cys_L        | L-Cysteine                                                                                   |
| kestotr      | Kestotetraose (3 fru, 1 glc inulin-type fructo-oligosaccharide)                              |
| kestopt      | Kestopentaose (4 fru, 1 glc inulin-type fructo-oligosaccharide)                              |
| kesto        | Kestose (2 fru, 1 glc inulin-type fructo-oligosaccharide)                                    |
| galur        | D-Galacturonate                                                                              |
| acnam        | N-Acetylneuraminic acid                                                                      |
| ppa          | Propionic acid                                                                               |
| fum          | Fumaric acid                                                                                 |
| lys_L        | L-Lysine                                                                                     |
| akg          | Oxoglutaric acid                                                                             |
| pect         | Pectin                                                                                       |
| rhamnogalurI | Potato rhamnogalacturonan I, MW assumed ~200000, 62 galur, 20 rmn, 12 gal, 3 arab-L, 1 xyl-D |
| pecticgal    | Pectic galactan (potato), gal: arab-L: rmn: galur = 78: 9: 4: 9                              |
| homogal      | Homogalacturonan, 100 galacturonate residues.                                                |
| ha           | Hyaluronic acid                                                                              |
| glcur        | D-Glucuronic acid                                                                            |
| gam          | Glucosamine                                                                                  |
| cspg_c       | Chondroitin Sulfate C (GalNac6S-Glca) Proteoglycan                                           |
| cspg_b       | Chondroitin Sulfate B / Dermatan Sulfate (IDoa2S-GalNac4S) Proteoglycan                      |
| cspg_a       | Chondroitin Sulfate A (GalNac4S-Glca) Proteoglycan                                           |

|               |                                                                                  |
|---------------|----------------------------------------------------------------------------------|
| arabinogal    | Larch arabinogalactan, gal/ara 6:1, small amount of glcur, MW ~116000            |
| xyluglc       | Xyluglucan                                                                       |
| lmn30         | Laminarin                                                                        |
| lichn         | Lichenin                                                                         |
| levan1000     | Levan                                                                            |
| hspg          | Heparan Sulfate Proteoglycan                                                     |
| glcmannan     | Konjac glucomannan                                                               |
| galmannan     | Carob galactomannan                                                              |
| dextran40     | Dextran 40, 1,6-alpha-D-Glucan                                                   |
| bglc          | Beta-Glucans                                                                     |
| arabinoxyl    | Arabinoxylan                                                                     |
| arabinan101   | Arabinan                                                                         |
| amylose300    | Amylose                                                                          |
| amylopect900  | Amylopectin                                                                      |
| xylan         | Xylan (Oat spelt)                                                                |
| rhamnogalurII | Wine rhamnogalacturonan II                                                       |
| mannan        | Alpha-mannan                                                                     |
| starch1200    | Starch n = 1200 repeat units (300 repeat units amylose, 900 repeats amylopectin) |
| but           | Butyric acid                                                                     |
| cellul        | Cellulose                                                                        |
| met_L         | L-Methionine                                                                     |
| chol          | Choline                                                                          |
| 4hpro_LT      | 4-Hydroxyproline                                                                 |
| oxa           | Oxalic acid                                                                      |
| oaa           | Oxaloacetic acid                                                                 |
| acgal         | N-Acetylgalactosamine                                                            |
